# Supplementary material for: Development and validation of simple and sensitive HPLC-UV method for ethambutol hydrochloride detection following transdermal application
Source: Royal Society of Chemistry journal article supplement (doi:10.1039/d1ay01414e), 2021-12-13
Supplement: d1ay01414e1.pdf [file d1ay01414e1.pdf]

## Supplementary data

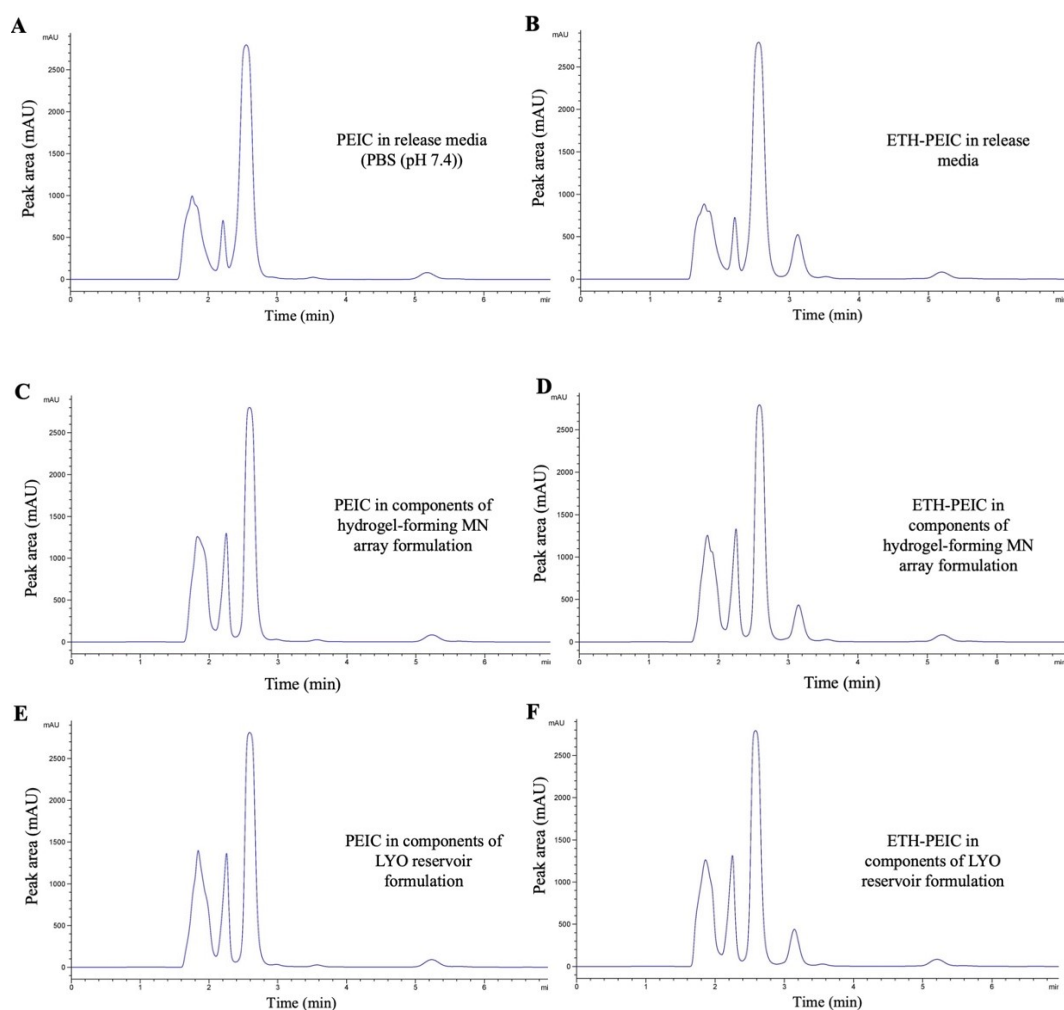

**Figure 1.** Representative chromatograms of ETH-PEIC in release media combined with other components that could possibly interfere in *in vitro* studies. (A) PEIC in release media, (B) ETH-PEIC in release media, (C) PEIC in mixture of hydrogel formulation, (D) ETH-PEIC in the mixture of hydrogel formulation, (E) PEIC in mixture of excipient of LYO reservoir formulation, (F) ETH-PEIC loaded in LYO formulation

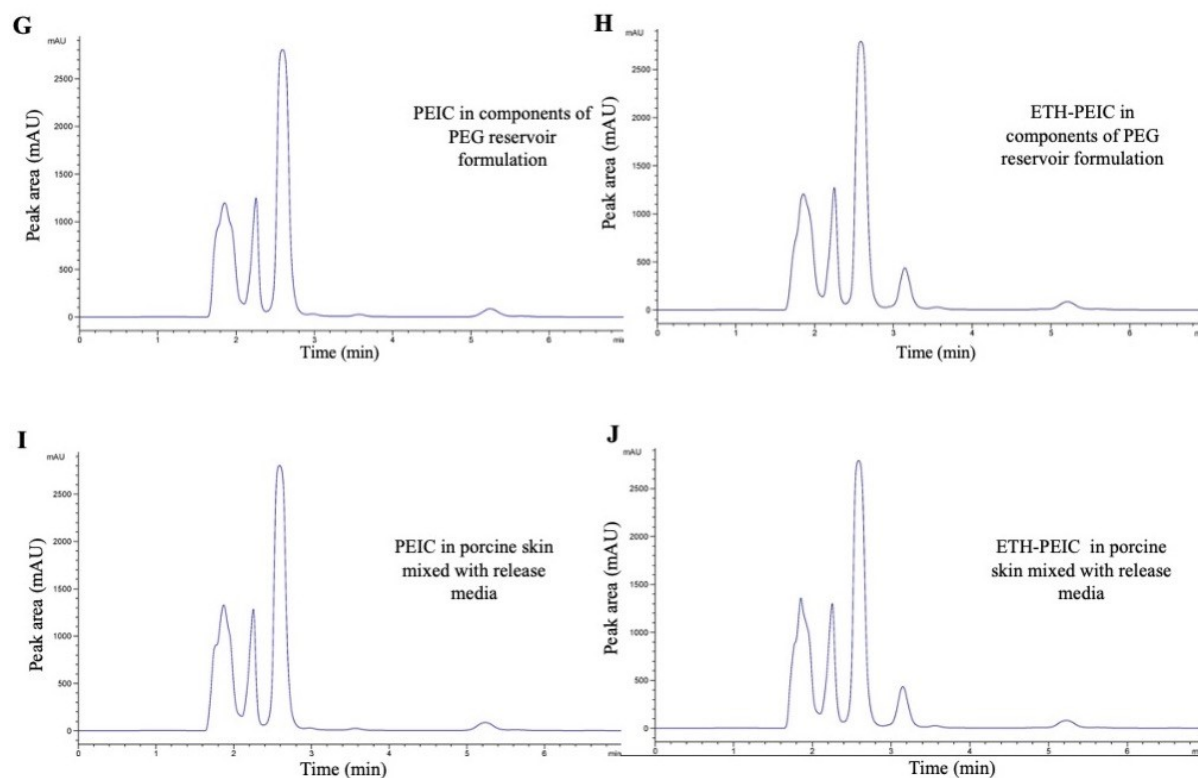

**Figure 1.** (Continued) Representative chromatograms of ETH-PEIC in release media combined with other components that could possibly interfere in *in vitro* studies. (G) PEIC in mixture of excipients of PEG reservoir formulation, (H) ETH-PEIC loaded in PEG formulation, (I) PEIC in mixture of porcine skin and release media, (J) ETH-PEIC in the mixture of porcine skin and release media.

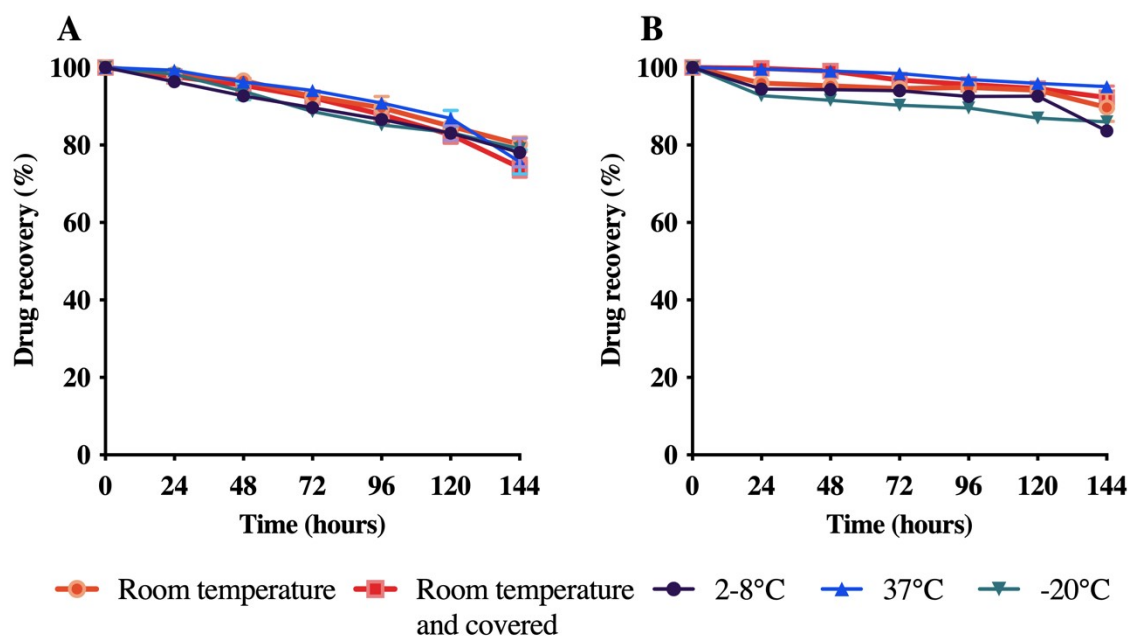

**Figure 2.** Percentage recovery of (A) ETH and (B) derivatisation products in PBS (pH 7.4) after exposure to different conditions in seven days (means  $\pm$  SD, n = 3).
